# Supplementary material
Source: bioRxiv or medRxiv preprint supplement (https://www.biorxiv.org/highwire/filestream/134117/field_highwire_adjunct_files/11/444521-5.pdf)

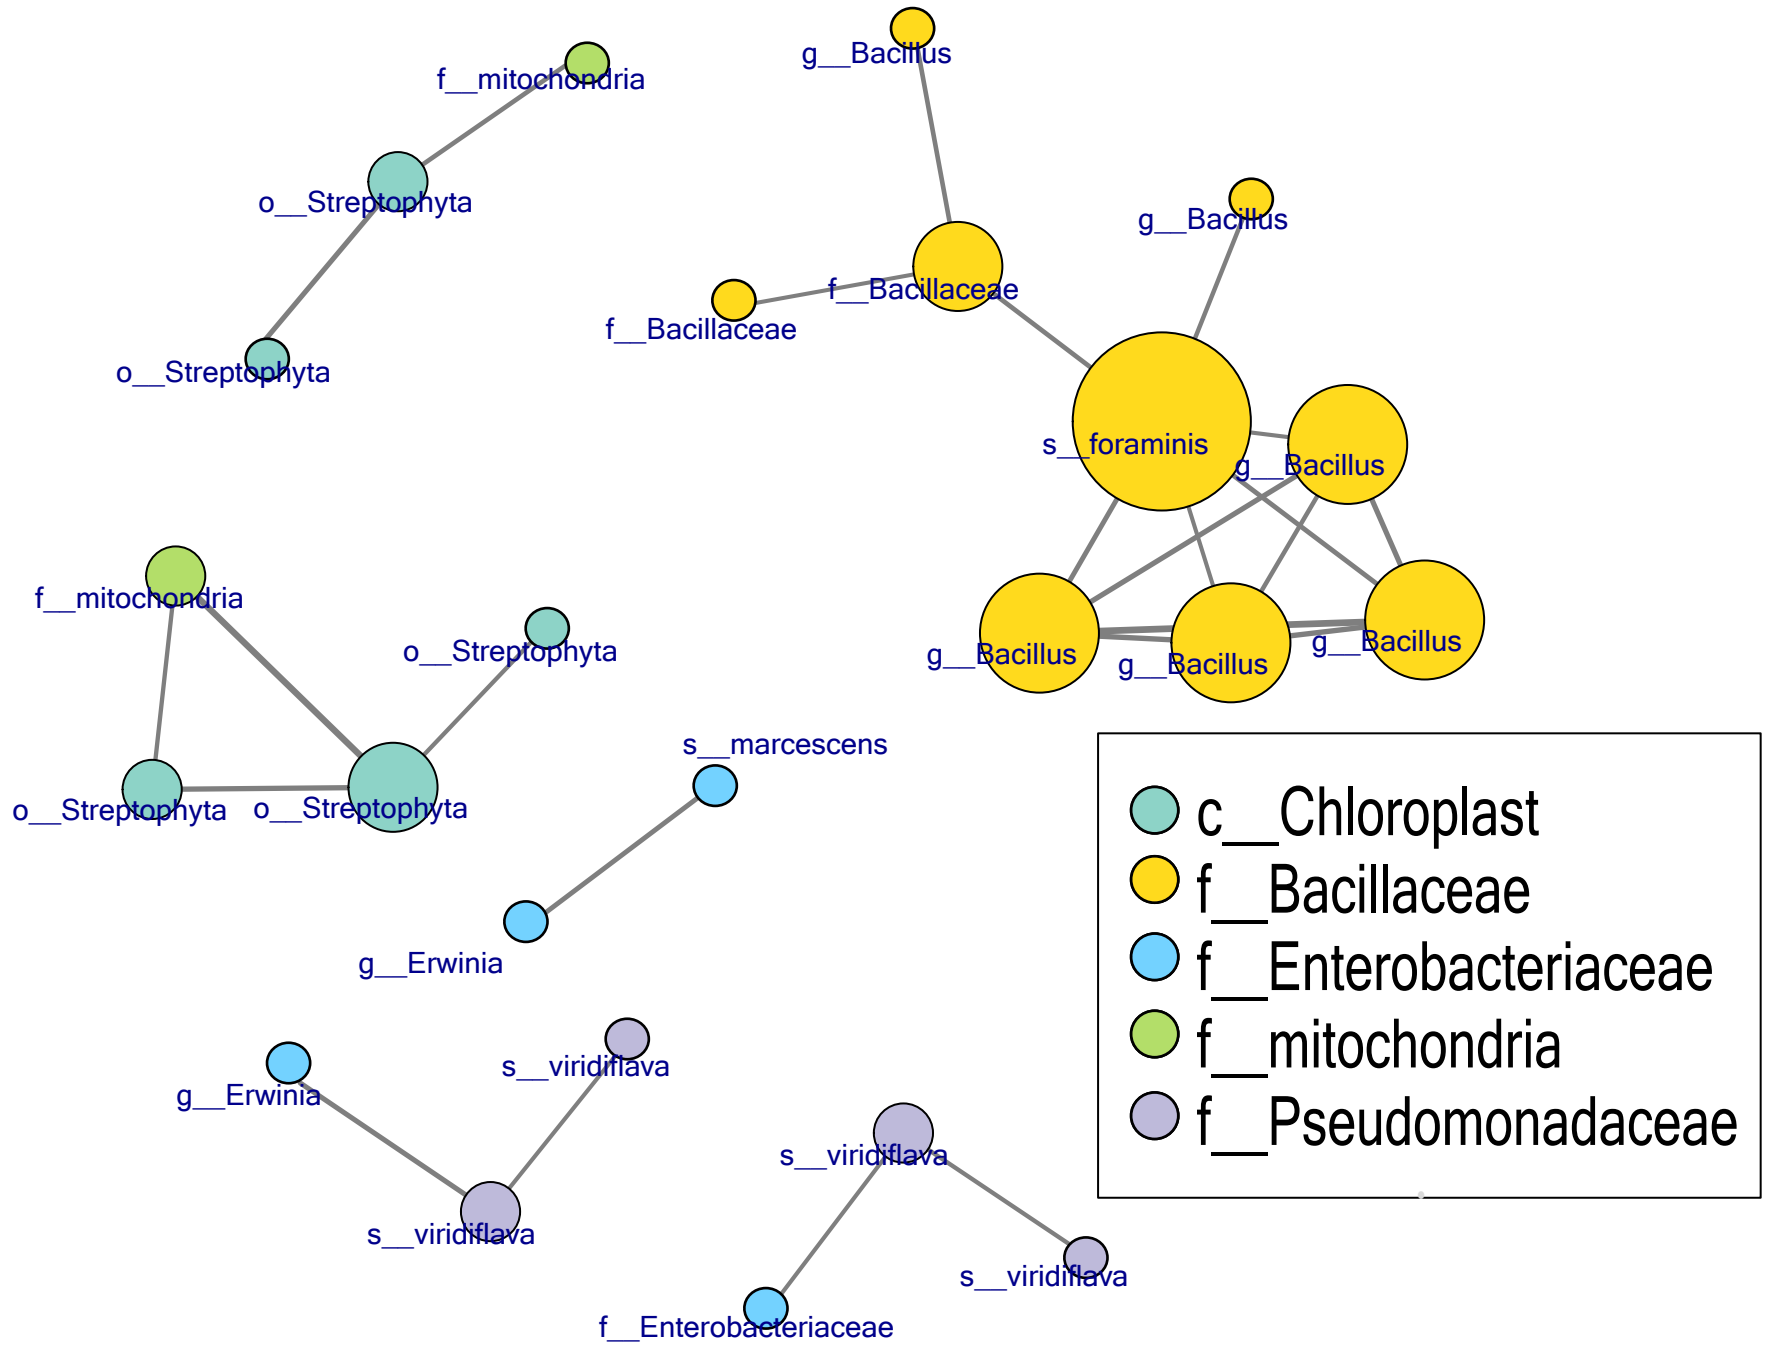

Supplement: Supplementary file [file 444521-5.pdf]
